# Supplementary material for: Elevated LSD1 and SNAIL Expression Indicate Poor Prognosis in Hypopharynx Carcinoma
Source: MDPI journal article supplement (doi:10.3390/ijms23095075), 2022-05-03

**Table S1.** Characteristics of the cohort. data not available (d.n.a.), Primary Tumor (PT), Lymph node metastasis (LN), Distant metastasis (DM), Local recurrence (LR), Cancer of unknown primary (CUP), positive (pos.), negative (neg.), without (w/o), progression (prog), overall survival (OS), Progrssion-free survival (PFS)

|                          |                |  | LSD1 staining n= | SNAIL staining n= |
|--------------------------|----------------|--|------------------|-------------------|
| <b>Patients analyzed</b> |                |  | 339              | 339               |
|                          | d.n.a.         |  | 5                | 7                 |
| <b>Tissue Type</b>       | PT             |  | 334              | 332               |
|                          | LN             |  | 163              | 165               |
|                          | DM             |  | 22               | 21                |
|                          | LR             |  | 59               | 57                |
| <b>Sub-Site</b>          | Hypopharynx    |  | 46               | 46                |
|                          | Larynx         |  | 98               | 95                |
|                          | Oral Cavity    |  | 76               | 76                |
|                          | Oropharynx     |  | 103              | 104               |
|                          | CUP / d.n.a.   |  | 11               | 11                |
| <b>Sex</b>               | male           |  | 259              | 258               |
|                          | female         |  | 74               | 73                |
|                          | d.n.a.         |  | 1                | 1                 |
| <b>Age</b>               | ≤ 61           |  | 54               | 52                |
|                          | > 61           |  | 178              | 178               |
|                          | d.n.a.         |  | 2                | 2                 |
| <b>T-Stage</b>           | T1             |  | 68               | 69                |
|                          | T2             |  | 98               | 98                |
|                          | T3             |  | 96               | 96                |
|                          | T4             |  | 70               | 67                |
|                          | d.n.a.         |  | 2                | 2                 |
| <b>N-Stage</b>           | N0             |  | 147              | 146               |
|                          | N1             |  | 51               | 51                |
|                          | N2             |  | 83               | 83                |
|                          | N3             |  | 50               | 50                |
|                          | d.n.a.         |  | 3                | 3                 |
| <b>M-Stage</b>           | M0             |  | 317              | 315               |
|                          | M1             |  | 14               | 14                |
|                          | d.n.a.         |  | 3                | 3                 |
| <b>UICC</b>              | I              |  | 66               | 69                |
|                          | II             |  | 59               | 57                |
|                          | III            |  | 59               | 59                |
|                          | IV             |  | 149              | 146               |
|                          | d.n.a.         |  | 1                | 1                 |
| <b>p16</b>               | pos.           |  | 85               | 88                |
|                          | neg.           |  | 249              | 244               |
|                          | d.n.a.         |  | 0                | 0                 |
| <b>Alcohol cons.</b>     | Yes            |  | 139              | 139               |
|                          | No             |  | 183              | 180               |
|                          | d.n.a.         |  | 2                | 3                 |
| <b>Nicotine cons.</b>    | Yes            |  | 281              | 279               |
|                          | No             |  | 36               | 35                |
|                          | d.n.a.         |  | 17               | 18                |
| <b>5 y. PFS</b>          | dead or prog.  |  | 148              | 147               |
|                          | alive w/o prog |  | 178              | 177               |
|                          | d.n.a.         |  | 8                | 8                 |
| <b>5 y. OS</b>           | dead           |  | 119              | 117               |
|                          | alive          |  | 207              | 107               |
|                          | d.n.a.         |  | 8                | 8                 |

**Table S2.** Univariate and multivariate Cox regression for PFS in primary hypopharyngeal HNSCC. Survival analysis of 5-year PFS in primary hypopharyngeal head and neck squamous cell carcinoma (HNSCC) using the Cox proportional hazards regression model. Only tumor and patient characteristics showing a significant correlation with 5-year PFS in the univariate analysis were included in the multivariate analysis. Characteristics and corresponding p-values showing a significant correlation in the multivariate analysis are bold.

| Variable        | Category      | Univariate HR<br>(95% -Konf. Int., p= ) | Multivariate HR<br>(95%- conf. int., p= ) |
|-----------------|---------------|-----------------------------------------|-------------------------------------------|
| LSD1-Expression | LSD1 low      | 2.53                                    | 3.72                                      |
|                 | LSD high      | (1.05-6.09, p=0.038)                    | (1.24-10.94, <b>p=0.028</b> )             |
| T- Stage        | T1,2,3        | 3.25                                    | 1.03                                      |
|                 | T4            | (1.29-8.21, p=0.013)                    | (0.35-3.01, p=0.924)                      |
| N-Stage         | N0,1          | 4.18                                    | 0.15                                      |
|                 | N2,3          | (1.53-11.43, p=0.005)                   | (0.02-1.02, p=0.052)                      |
| M-Stage         | M0            | 4.21                                    |                                           |
|                 | M1            | (0.53-33.28, p=0.173)                   |                                           |
| UICC-Stage      | UICC I,II,III | 7.37                                    | 44.56                                     |
|                 | UICC IV       | (2.16-25.15, p=0.001)                   | (4.18-475.45, <b>p=0.002</b> )            |
| Sex             | Male          | 0.39                                    |                                           |
|                 | Female        | (0.09-1.66, p=0.202)                    |                                           |
| Age             | ≤ 61 y.       | 0.97                                    |                                           |
|                 | > 61 y.       | (0.42-2.22, p=0.943)                    |                                           |
| p16             | Positive      | 2.76                                    |                                           |
|                 | Negative      | (0.37-20.51, p=0.321)                   |                                           |
| Alcohol         | Yes           | 0.71                                    |                                           |
|                 | No            | (0.28-1.75, p=0.453)                    |                                           |
| Nicotine        | Yes           | 2.63                                    |                                           |
|                 | No            | (0.61-11.41, p=0.197)                   |                                           |

**Table S3.** Univariate and multivariate Cox regression for in primary HNSCC. 5-year OS analysis using the Cox proportional hazards regression model. Multivariate analysis was performed with all tumor and patient characteristics showing a significant correlation with patient survival in the univariate analysis. Characteristics and corresponding p-values showing a significant correlation in the multivariate analysis are bold.

| Variable         | Category    | Univariate HR<br>(95% -Konf. Int., p= ) | Multivariate HR<br>(95%- conf. int., p= ) |
|------------------|-------------|-----------------------------------------|-------------------------------------------|
| SNAIL-Expression | SNAIL low   | 1.45                                    | 1.57                                      |
|                  | SNAIL high  | (1.01-2.10, p=0.046)                    | (1.07-2.31, <b>p=0.021</b> )              |
| T- Stage         | T1,2        | 2.14                                    | 1.79                                      |
|                  | T3,4        | (1.47-3.11, p<0,001)                    | (1.08-2.99, <b>p=0.025</b> )              |
| N-Stage          | N0          | 1.67                                    | 1.49                                      |
|                  | N1,2,3      | (1.14-2.44, p=0.009)                    | (0.98-2.36, p=0.088)                      |
| M-Stage          | M0          | 5.15                                    | 5.15                                      |
|                  | M1          | (2.74-9.67, p<0.001)                    | (2.64-10.03, <b>p&lt;0.001</b> )          |
| UICC-Stage       | UICC I,II   | 2.32                                    | 1.19                                      |
|                  | UICC III,IV | (1.52-3.53, p<0,001)                    | (0.61-2.34, p=0.606)                      |
| Sex              | Male        | 0.80                                    |                                           |
|                  | Female      | (0.51-1.27, p=0.345)                    |                                           |
| Age              | ≤ 61 y.     | 1.25                                    |                                           |
|                  | > 61 y.     | (0.86-1.81, p=0.236)                    |                                           |
| p16              | Positive    | 1.93                                    | 1.70                                      |
|                  | Negative    | (1.20-3.13, p=0.007)                    | (0.96-3.01, p=0.071)                      |
| Alcohol          | Yes         | 0.57                                    | 0.74                                      |
|                  | No          | (0.40-0.84, p=0.004)                    | (0.50-1.09, p=0.125)                      |
| Nicotine         | Yes         | 0.60                                    |                                           |
|                  | No          | (0.29-1.22, p=0.158)                    |                                           |

**Table S4.** Univariate and multivariate cox regression of PFS in primary HNSCC. Survival analysis of 5-year PFS in primary HNSCC using the Cox proportional hazards regression model. All tumor and patient characteristics showing a significant correlation with 5-year survival in the univariate analysis were included in the multivariate analysis. Characteristics and corresponding p-values showing a significant correlation in the multivariate analysis are bold.

| Variable         | Category    | Univariate HR<br>(95% -Konf. Int., p= ) | Multivariate HR<br>(95%- conf. int., p= ) |
|------------------|-------------|-----------------------------------------|-------------------------------------------|
| SNAIL-Expression | SNAIL low   | 1.63                                    | 1.82                                      |
|                  | SNAIL high  | (1.17-2.26, p=0.004)                    | (1.29-2.57, <b>p=0.001</b> )              |
| T- Stage         | T1,2        | 2.10                                    | 1.79                                      |
|                  | T3,4        | (1.51-2.94, p<0.001)                    | (1.12-2.85, <b>p=0.014</b> )              |
| N-Stage          | N0          | 1.40                                    |                                           |
|                  | N1,2,3      | (1.00-1.95, p=0.051)                    |                                           |
| M-Stage          | M0          | 3.41                                    | 3.45                                      |
|                  | M1          | (1.83-6.32, p<0.001)                    | (1.80-6.63, <b>p&lt;0.001</b> )           |
| UICC-Stage       | UICC I,II   | 2.19                                    | 1.38                                      |
|                  | UICC III,IV | (1.52-3.16, p<0.001)                    | (0.81-2.34, p=0.238)                      |
| Sex              | Male        | 0.84                                    |                                           |
|                  | Female      | (0.56-1.26, p=0.398)                    |                                           |
| Age              | ≤ 61 y.     | 1.22                                    |                                           |
|                  | > 61 y.     | (0.88-1.69, p=0.241)                    |                                           |
| p16              | Positive    | 2.20                                    | 1.79                                      |
|                  | Negative    | (1.42-3.41, p<0.001)                    | (1.10-2.90, <b>p=0.018</b> )              |
| Alcohol          | Yes         | 0.63                                    | 0.81                                      |
|                  | No          | (0.45-0.87, p=0.006)                    | (0.57-1.14, p=0.224)                      |
| Nicotine         | Yes         | 0.76                                    |                                           |
|                  | No          | (0.43-1.35, p=0.354)                    |                                           |

**Figure S1.** Exemplary HE stained TMA Cores. Exemplary Tissue Micro Array (TMA) cores of the cohort stained with standard hematoxylin and eosin (HE) staining.

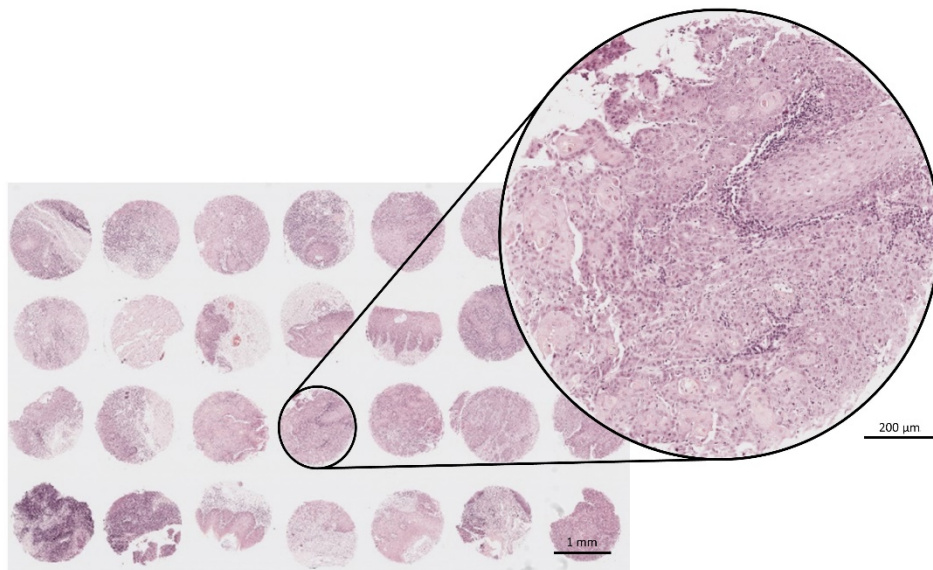

Supplement: s1 [file s1]
